# Supplementary material for: Genome-Wide Association Analysis of Radiation Resistance in Drosophila melanogaster
Source: PLoS One. 2014 Aug 14;9(8):e104858. doi: 10.1371/journal.pone.0104858 (PMC4133248; doi:10.1371/journal.pone.0104858)
Supplement: Table S9 — Number of SNPs and human homologs of Drosophila DNA damage and repair genes. (XLSX) [file pone.0104858.s009.xlsx]

## Sheet: Sheet1
Table S9. Number of SNPs and human homologs of Drosophila DNA Damage and Repair Genes
Base Excision Repair
Drosophila gene	Human homolog	# SNPs
Ogg1	OGG1	35
CG9272	NTHL1	48
Rrp1	APEX1	64
lig3	LIG3	55
XRCC1	XRCC1	101
Mismatch Repair
Drosophila gene	Human homolog	# SNPs
Msh2	MSH2	193
Msh6	MSH6	148
Mlh1	MLH1	58
Pms2	PMS2	80
Nucleotide Excision Repair
Drosophila gene	Human homolog	# SNPs
mus201	ERCC5	211
mus210	XPC	225
CG10694	RAD23A	20
Xpac	XPA	33
pic	DDB1	80
RpA-70	RPA1	43
RPA2	RPA2	35
Tfb1	GTF2H1	54
Tfb2	TFIIH	39
Tfb4	GTF2H3	47
hay	ERCC3	129
Xpd	ERCC2	168
Ssl1	GTF2H2	18
Ercc1	ERCC1	31
mei9	ERCC4	141
DNA-ligI	LIG1	66
CG6197	XAB2	125
Mms19	MMS19	58
CG4078	RTEL1	73
Homologous Recombination
Drosophila gene	Human homolog	# SNPs
Rad51	RAD51	35
Rad51D	RAD51D	120
spnB	XRCC3	49
okra	RAD54L	98
rad50	RAD50	157
mre11	MRE11A	57
Nbs1	NBN	122
mus81	MUS81	550
six1	GIYD1	25
CG42299	NSMCE2	18
Fanconi Anemia
Drosophila gene	Human homolog	# SNPs
Brca2	BRCA2	76
Fancd2	FANCD2	159
FANCI	FANCI	111
Fancl	FANCL	19
Rad51C	FANCO	24
Non-homologous End-joining
Drosophila gene	Human homolog	# SNPs
Ku70	XRCC6	669
Ku80	XRCC5	190
Lig4	LIG4	81
DNA Polymerases (Modulation of Nucleotide Pools)
Drosophila gene	Human homolog	# SNPs
DNApol-γ	POLG	184
DNApol-γ35	POLG2	52
DNApol-δ	POLD1	83
DNApol-η	POLH	54
DNApol-ι	POLI	54
CG12018	POLD2	28
Chrac-14	POLE3	60
Chrac-16	POLE4	17
mus205	POLZ	196
mus209	PCNA	45
rev7	MAD2L2	8
Rev1	REV1	92
mus308	POLQ	110
DNA Damage Checkpoint Genes
Drosophila gene	Human homolog	# SNPs
Chk1	CHEK1	720
Chk2	CHEK2	75
p53	TP53	110
Top2	TOP2A	96
mus101	TOPBP1	171
mus304	None	121
RecQ4	None	174
Rad1	RAD1	44
Rad9	RAD9A	42
Rad17	RAD17	103
Editing and Processing Nucleases
Drosophila gene	Human homolog	# SNPs
Fen1	FEN1	33
CG3165	TREX2	42
tos	EXO1	79
CG5316	APTX	130
mei-W68	SPO11	77
Ubiquitination and Modification
Drosophila gene	Human homolog	# SNPs
RAD6	UBE2A	68
Iswi	SMARCA5	104
CG9203	SPRTN	39
elfless	RNF4	74
Uev1A	UBE2V2	176
ben	UBE2N	87
Chromatin Structure and Modification
Drosophila gene	Human homolog	# SNPs
Caf1-180	CHAF1A	105
G9a	SETMAR	89
Genes Predisposing to Radiation Sensitivity
Drosophila gene	Human homolog	# SNPs
Blm	BLM	78
RecQ5	WRN	134
ATM	ATM	256
Repair of DNA Topoisomerase Crosslinks
Drosophila gene	Human homolog	# SNPs
gkt	TDP1	103
Other Genes
Drosophila gene	Human homolog	# SNPs
Snm1	DCLRE1A	22
CG13142	NSMCE4A	57
cry	CRY1	208
phr6-4	CRY2	82
CG5524	SMC6	141
CG11329	NSMCE1	32
CG10898	NUDT18	68
CG4049	ATRX	193
CG6812	SFXN1	157
ATR	ATR	199
Spf45	RBM17	17
Top3α	TOP3A	58
Hus1	HUS1	65
phr	None	37
mu2	None	291
Pol32	None	68
